# Supplementary material for: An Evidence-Based Rapid Review of Surgical Techniques for Correction of Prolapsed Nictitans Glands in Dogs
Source: MDPI journal article supplement (doi:10.3390/vetsci5030075), 2018-08-23
Supplement: s1 [file s1]

# Supplementary Materials: An Evidence-Based Review of Surgical Techniques for Correction of Prolapsed Nictitans Glands in Dogs

Constance White and Marnie L. Brennan \*

Table S1. Search strategies and terms.

| Database                                                                                                                         | Search                                                                                                                                                                                                                                                                                                                                                                                                                                                                                                                                                                                                                                                                                                                                                                                                                                                                                                                                                                                              |
|----------------------------------------------------------------------------------------------------------------------------------|-----------------------------------------------------------------------------------------------------------------------------------------------------------------------------------------------------------------------------------------------------------------------------------------------------------------------------------------------------------------------------------------------------------------------------------------------------------------------------------------------------------------------------------------------------------------------------------------------------------------------------------------------------------------------------------------------------------------------------------------------------------------------------------------------------------------------------------------------------------------------------------------------------------------------------------------------------------------------------------------------------|
| <b>CAB Abstracts<br/>(1910-present)<br/>(Ovid interface)</b>                                                                     | (canine or canines or canid or canids or canis or canidae or dog or dogs).mp. or exp Dogs/ or exp Canidae/<br>AND<br>(nictitan or nictitans or third eyelid or third eyelids or cherry eye or cherry eyes or nictitating membrane or nictitating membranes).mp.<br>AND<br>(prolapse or prolapsed or prolapses or replacement or replacements or replaced or replace or surgery or surgical or repair or amputate or amputated).mp. or exp prolapse/ or exp surgery/<br>(canine or canines or canid or canids or canis or canidae or dog or dogs).mp. or exp Dogs/ or exp Canidae/<br>AND                                                                                                                                                                                                                                                                                                                                                                                                            |
| <b>Medline (In-Process &amp;<br/>Other Non-Indexed<br/>Citations and<br/>MEDLINE(R) 1946 to<br/>Present<br/>(Ovid interface)</b> | (nictitan or nictitans or third eyelid or third eyelids or cherry eye or cherry eyes or nictitating membrane or nictitating membranes).mp. or exp Nictitating Membrane/<br>AND<br>(prolapse or prolapsed or prolapses or replacement or replacements or replaced or replace or surgery or surgical or repair or amputate or amputated).mp. or exp Prolapse/ or exp General surgery/<br><u>((((((((((canine) OR canines) OR canis) OR canis) OR canis) OR canidae) OR dog) OR dogs) OR Dogs[MeSH Major Topic]) OR Canidae[MeSH Major Topic])) AND (((((((((nictitans) OR nictitans) OR third eyelid) OR third eyelids) OR cherry eye) OR cherry eyes) OR nictitating membrane) OR nictitating membranes) OR nictitating membrane[MeSH Major Topic])) AND (((((((((((prolapse) OR prolapse) OR prolapses) OR replacement) OR replacements) OR replaced) OR replace) OR surgery) OR surgical) OR repair) OR amputated) OR amputated) OR prolapse[MeSH Major Topic]) OR surgery[MeSH Major Topic]))</u> |
| <b>PubMed<br/>(native interface)</b>                                                                                             |                                                                                                                                                                                                                                                                                                                                                                                                                                                                                                                                                                                                                                                                                                                                                                                                                                                                                                                                                                                                     |

Table S2. Extraction form.

| <b>Publication</b>                      |                                                                                                                                                                                                                                                                                                                                                       |                                                                                                                                                                                                                                                                                                                                                                                                                                                                                                                                                                                            |
|-----------------------------------------|-------------------------------------------------------------------------------------------------------------------------------------------------------------------------------------------------------------------------------------------------------------------------------------------------------------------------------------------------------|--------------------------------------------------------------------------------------------------------------------------------------------------------------------------------------------------------------------------------------------------------------------------------------------------------------------------------------------------------------------------------------------------------------------------------------------------------------------------------------------------------------------------------------------------------------------------------------------|
| <i>Variable</i>                         | Reported                                                                                                                                                                                                                                                                                                                                              | Details                                                                                                                                                                                                                                                                                                                                                                                                                                                                                                                                                                                    |
| <i>dogs/eyes</i>                        | <b>R</b> all dogs and eyes enumerated<br><b>PR</b> dogs enumerated or eyes enumerated but not both<br><b>NR</b> neither dogs nor eyes enumerated                                                                                                                                                                                                      |                                                                                                                                                                                                                                                                                                                                                                                                                                                                                                                                                                                            |
| <i>Procedure</i>                        |                                                                                                                                                                                                                                                                                                                                                       |                                                                                                                                                                                                                                                                                                                                                                                                                                                                                                                                                                                            |
| <i>Reported design</i>                  | <b>R</b> Authors presented key elements of study design early in the paper<br><b>NR</b> Authors did not describe study type or present key elements of study design early in the paper                                                                                                                                                                |                                                                                                                                                                                                                                                                                                                                                                                                                                                                                                                                                                                            |
| <i>Study type</i>                       | <b>R</b> Author indicated type of study design and key elements<br><b>NR</b> Authors did not indicate study design and key elements                                                                                                                                                                                                                   | 1. Experimental<br>Randomized interventions (parallel or crossover)<br>2. Observational Population Cohort<br>a. Enrolled as a result of exposure (PNG with more than one <b>intervention group</b> ), incidence or enumeration of outcomes (recurrence and/or lacrimal results) reported<br>3. Surgical Case Series<br>Cases enrolled as a result of exposure (PNG with <b>single intervention group</b> ) with incidence or enumeration of outcomes (recurrence and/or lacrimal results) reported. (Some authors suggest that this may also be classified as a descriptive cohort study). |
| <i>Case selection (sampling method)</i> | <b>R</b> Reported source, eligibility criteria and methods of selection of cases<br><b>PR</b> Reported one or two of the above<br><b>NR</b> Did not report any of the above                                                                                                                                                                           |                                                                                                                                                                                                                                                                                                                                                                                                                                                                                                                                                                                            |
| <i>Follow-up time</i>                   | <b>R</b> Reported follow-up time for all reported outcomes on all patients<br><b>PR</b> Reported follow-up time for some but not all outcomes, or some but not all patients<br><b>NR</b> Did not report follow-up time for any outcome                                                                                                                |                                                                                                                                                                                                                                                                                                                                                                                                                                                                                                                                                                                            |
| <i>Follow-up method</i>                 |                                                                                                                                                                                                                                                                                                                                                       |                                                                                                                                                                                                                                                                                                                                                                                                                                                                                                                                                                                            |
| <i>Loss to follow-up</i>                | <b>R</b> Numbers of cases at each stage of study enumerated and/or patient-level follow-up times reported; reasons for non-participation given; explanation of how missing data and/or loss to follow-up was addressed in statistical analysis (if statistical analysis performed)<br><b>PR</b> Number of cases at each stage of the study enumerated |                                                                                                                                                                                                                                                                                                                                                                                                                                                                                                                                                                                            |

|                                        |                                                                                                                                                                                                                                                                                                                                                                                                               |
|----------------------------------------|---------------------------------------------------------------------------------------------------------------------------------------------------------------------------------------------------------------------------------------------------------------------------------------------------------------------------------------------------------------------------------------------------------------|
|                                        | <p><b>Unclear</b> Cohort inclusion may have depended on minimum follow-up period/availability of case records</p>                                                                                                                                                                                                                                                                                             |
| <i>Prolapse duration</i>               | <p><b>R</b> Prolapse duration prior to surgery reported either as summary statistic, range, or patient-level data</p> <p><b>NR</b> No data given on prolapse duration</p>                                                                                                                                                                                                                                     |
| <i>Patient demographics enrollment</i> | <p><b>R</b> Breeds enumerated for all patients in study. Ages given as summary statistic and/or at patient level</p> <p><b>PR</b> Reporting of the above for part, but not all, of the cohort; or only breed or age but not both given.</p> <p><b>NR</b> No demographics provided for any of cohort</p>                                                                                                       |
| <i>Patient demographics outcomes</i>   | <p><b>R</b> Surgical failure or lacrimal outcomes reported and/or analyzed by breed</p> <p><b>PR</b> Outcomes adjusted for or reported for selected breeds but not all breeds in cohort</p> <p><b>NR</b> Surgical failure or lacrimal outcomes not reported for and/or analyzed by breed</p>                                                                                                                  |
| <i>Pre-operative steroid</i>           | <p><b>R</b> Pre-operative care reported in sufficient detail to know which patients, if any, received pre-operative topical steroid</p> <p><b>PR</b> Pre-operative care reported in insufficient detail to know which patients, if any, received pre-operative topical steroid</p> <p><b>NR</b> Pre-operative care not reported sufficiently to know if any patients received pre-operative steroid</p>       |
| <i>Postop steroid</i>                  | <p><b>R</b> Post-operative care reported in sufficient detail to know which patients, if any, received post-operative topical steroid</p> <p><b>PR</b> Post-operative care reported in insufficient detail to know which patients, if any, received post-operative topical steroid</p> <p><b>NR</b> Post-operative care not reported sufficiently to know if any patients received post-operative steroid</p> |
| <i>Recurrence</i>                      | <p><b>R</b> Reprolapse after surgical correction reported in sufficient detail to present or calculate a surgical failure rate per eye</p> <p><b>PR</b> Reprolapse after surgical correction reported in sufficient detail to present or calculate a surgical failure rate per dog but not per eye</p> <p><b>NA</b> No possibility of recurred prolapse (e.g. excision)</p>                                   |
| <i>Time to recurrence</i>              | <p><b>R</b> reported summary statistic or patient-level data on time to surgical failure</p>                                                                                                                                                                                                                                                                                                                  |

|                      |                                                                                                                                                                                                                   |
|----------------------|-------------------------------------------------------------------------------------------------------------------------------------------------------------------------------------------------------------------|
|                      | <b>PR</b> Time to recurrence provided for some but not all cases of surgical failure<br><b>NR</b> No data on time to surgical failure<br><b>NA</b> No recurrences possible (excision) or observed                 |
| <i>Complications</i> | Post-operative complications aside from recurrence                                                                                                                                                                |
| <i>STT</i>           | <b>R</b> Post-operative STT results reported for some or all cases<br><b>NR</b> No STT data presented for any cases                                                                                               |
| <i>KCS</i>           | <b>R</b> Report incidence or number of post-operative KCS for all included cases<br><b>PR</b> Reporting of post-operative incidence for subset of cases<br><b>NR</b> No reporting of post-operative KCS incidence |
| <i>KCS criteria</i>  | <b>R</b> Criteria for diagnosis of KCS defined<br><b>NR</b> No criteria given for diagnosis of KCS<br><b>NA</b> KCS not reported                                                                                  |

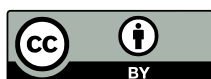

© 2018 by the authors. Submitted for possible open access publication under the terms and conditions of the Creative Commons Attribution (CC BY) license (<http://creativecommons.org/licenses/by/4.0/>).
